# Supplementary material for: Multi-tissue analysis reveals short tandem repeats as ubiquitous regulators of gene expression and complex traits
Source: bioRxiv or medRxiv preprint supplement (doi:10.1101/495226), 2019-08-09
Supplement: Supplementary file [file media-1.pdf]

**Figure S1.** Related to Figure 1

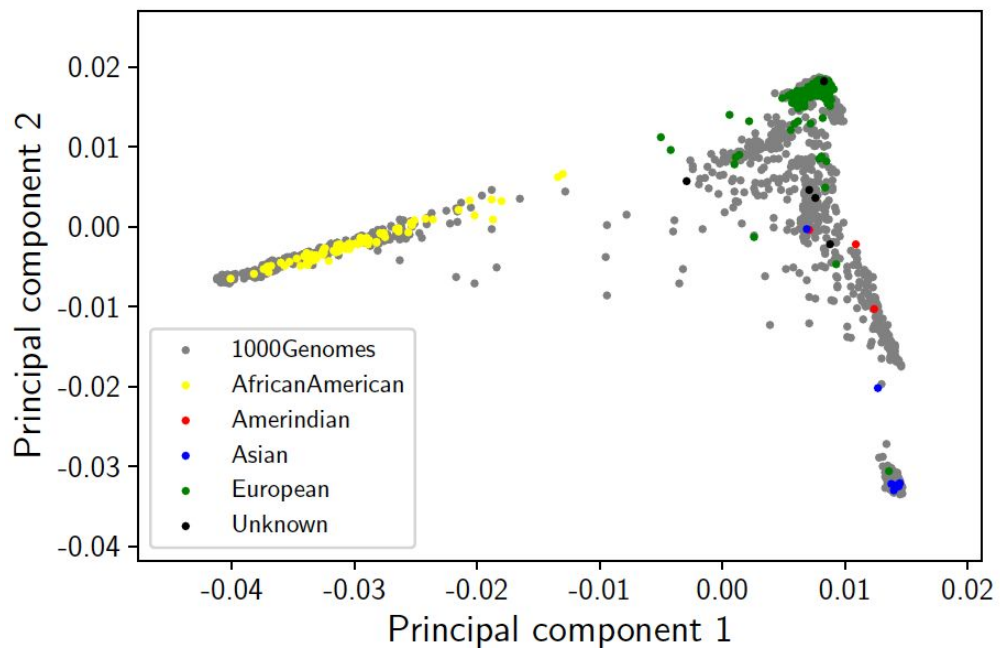

**Analysis of GTEx population structure.** Principal component analysis was performed using SNP genotypes from the GTEx and 1000G cohorts. Samples from the 1000 Genomes project are shown in gray and GTEx samples are shown as colored dots based on ethnicity provided for each sample (yellow=African American; red=Amerindian; blue=Asian; green=European, black=Unknown).



**Figure S3.** Related to Figure 1

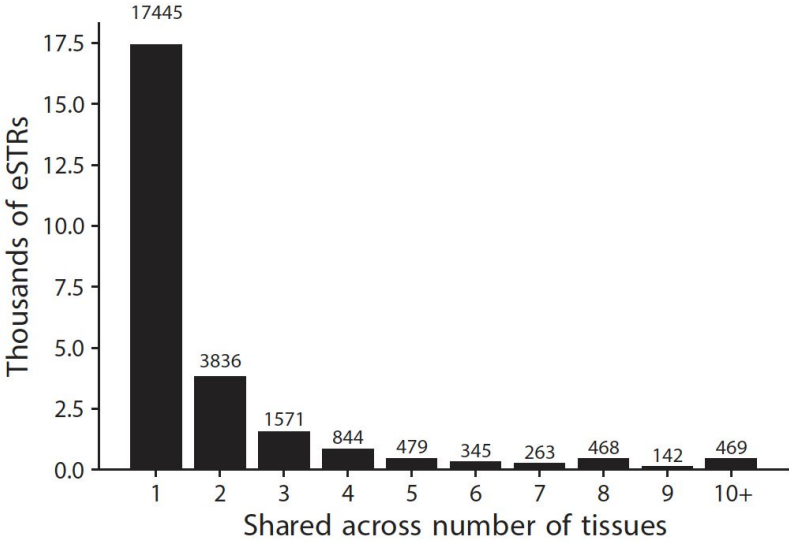

**Sharing of eSTRs across tissues.** The x-axis represents the number of tissues that share a given eSTR. The y-axis and annotated values for each bar represent the number of eSTRs shared across a given number of tissues.

Figure S4. Related to Figure 1

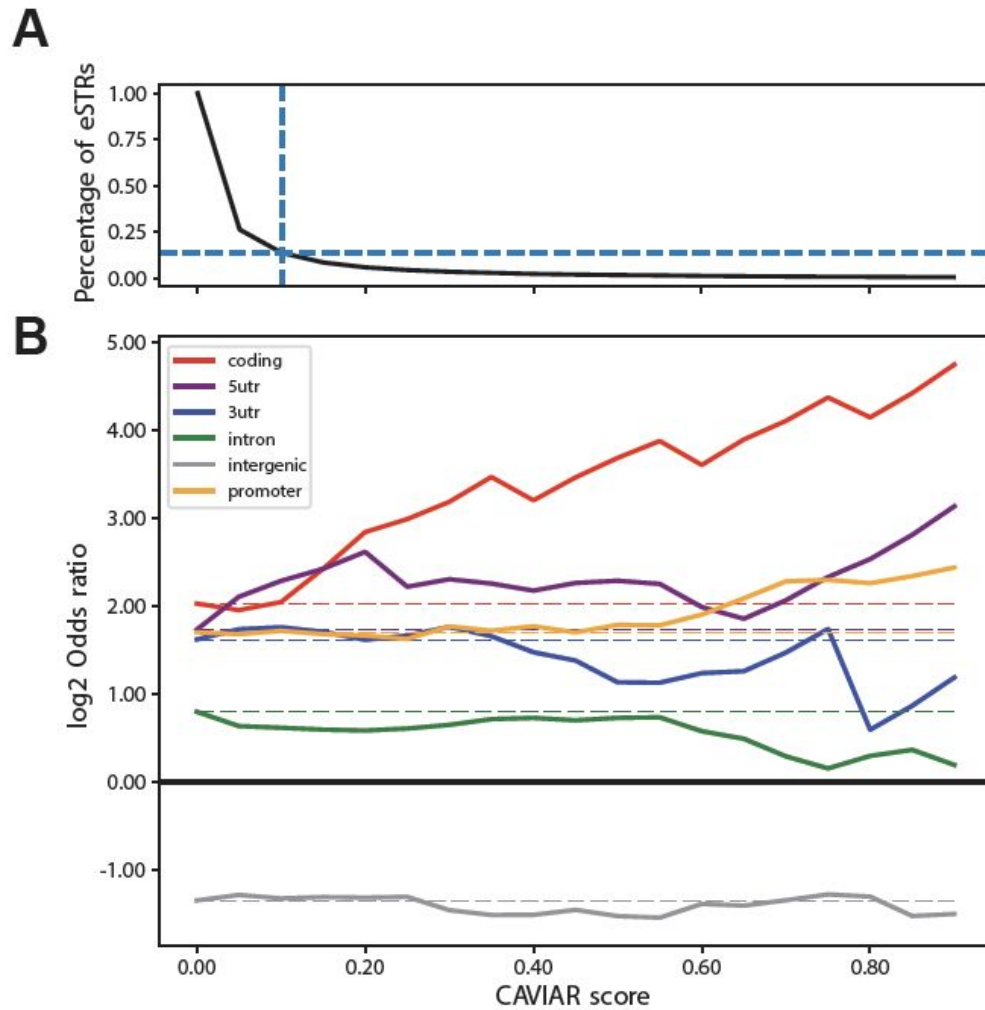

**FM-eSTRs are enriched in coding and regulatory regions. A. Percent of eSTRs that are annotated as FM-eSTRs as a function of CAVIAR threshold.** The x-axis represents CAVIAR scores and the y-axis gives the percentage of eSTRs with CAVIAR scores in at least one tissue above each threshold. The dashed horizontal line gives the percent of eSTRs with CAVIAR scores of at least 10%. **B. Enrichment of gene annotation categories as a function of CAVIAR threshold.** The y-axis represents the log<sub>2</sub> odds ratio for enrichment of each category in eSTRs passing each threshold (solid line). The dashed line represents the odds ratio when considering all eSTRs regardless of CAVIAR score. Red=coding, purple=5' UTR, blue=3' UTR, green=intron, gray=intergenic, orange=promoter (within 3kb upstream of each gene).

**Figure S5.** Related to Figure 2

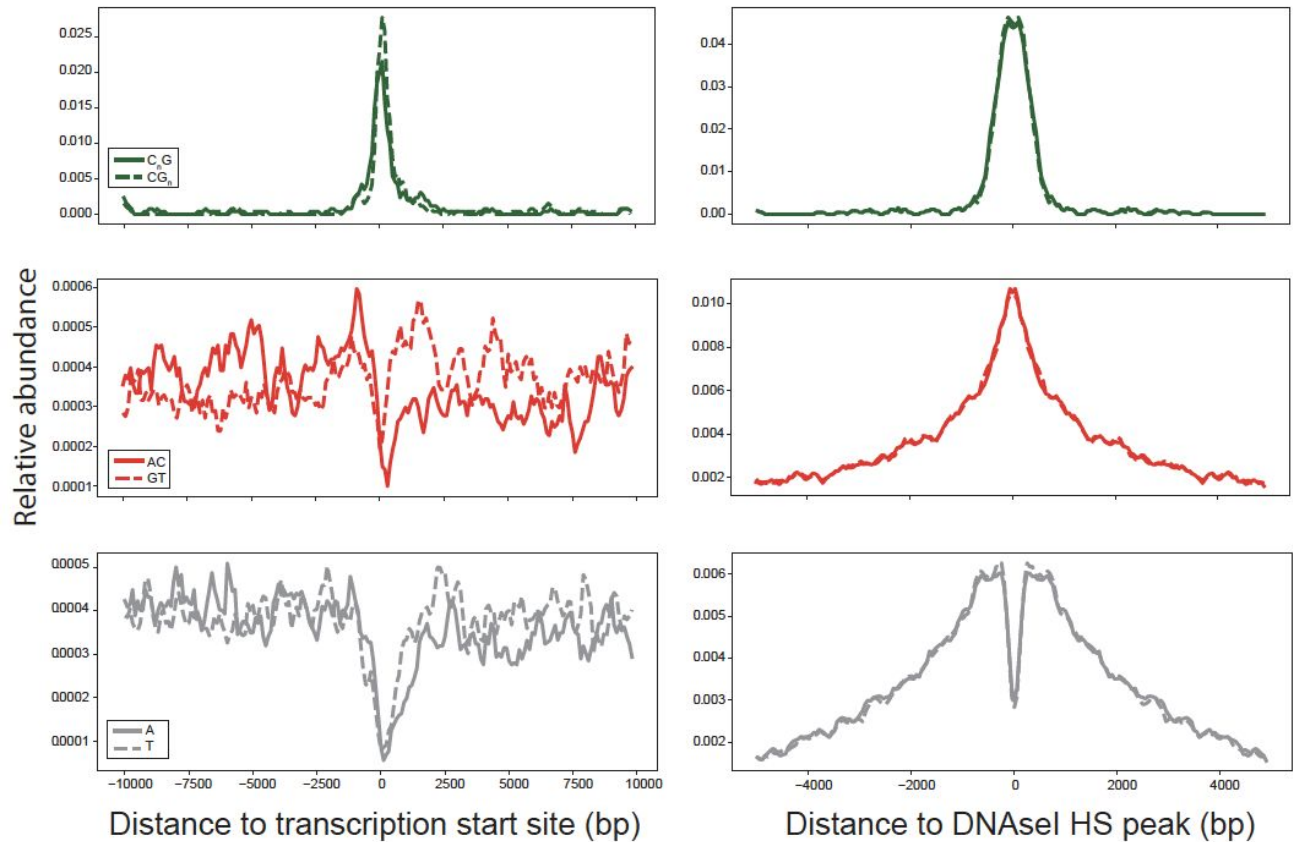

**Localization of all STRs around putative regulatory regions.** Left and right plots show localization around transcription start sites and DNaseI HS clusters, respectively. The y-axis denotes the relative number of STRs of each type in each bin. For promoters, the x-axis is divided into 100bp bins. For DNaseI HS sites, the x-axis is divided into 50bp bins. In each plot, values were smoothed by taking a sliding average of each four consecutive bins. Only STR-gene pairs passing all filters are considered. Each plot compares localization of the two possible sequences of a given repeat motif on the coding strand. *i.e.* top plots compare motifs of the form  $C_nG$  vs. their reverse complement on the opposite strand, middle plots compare AC vs. GT repeats, and bottom plots compare A vs. T repeats. The strand of each STR was determined based on the coding strand of each target gene.

**Figure S6.** Related to Figure 4

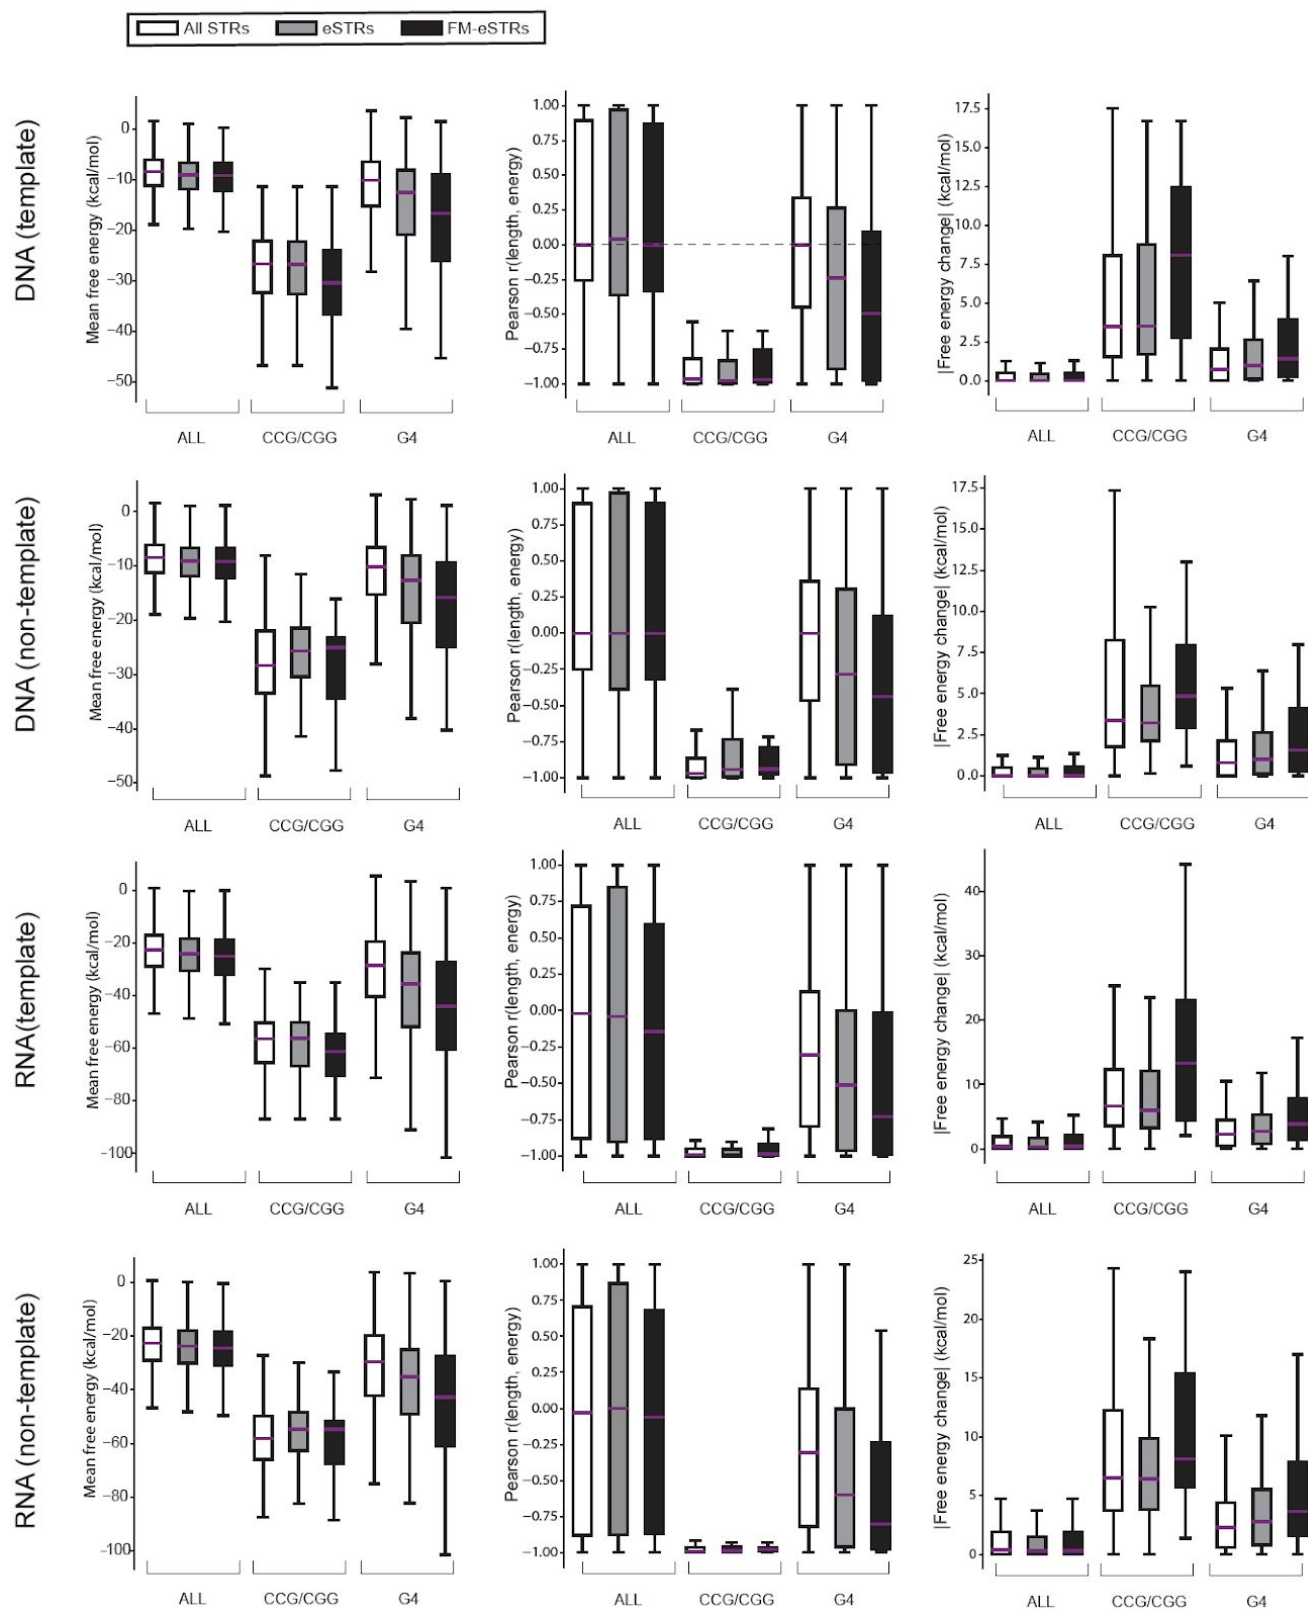

**GC-rich eSTRs modulate DNA or RNA secondary structure.** Plots are same as those shown in **Figure 4C-E** (top row), but are additionally shown for sequences on the non-template DNA strand (2nd row), template RNA strand (3rd row), and non-template RNA strand (4th row). **Left: Free energy of STRs and their context.** Boxplots show the distribution of free energy for each STR +/- 50bp of context sequence, computed as the average across all alleles at each STR. **Center: Pearson correlation between STR length and free energy.** Correlations were computed separately for each STR, and plots show the distribution of correlation coefficients across all STRs. **Right: Magnitude of free energy change across alleles.** For each STR the absolute value of the difference in energy between the shortest and longest allele was computed. Plots show the distribution of these values across all STRs. For **C-E**, purple lines give medians and boxes span from the 25th percentile (Q1) to the 75th percentile (Q3). Whiskers extend to  $Q1 - 1.5 * IQR$  (bottom) and  $Q3 + 1.5 * IQR$  (top), where IQR gives the interquartile range ( $Q3 - Q1$ ). White boxes show all STRs in each category, gray boxes show eSTRs, and black boxes show FM-eSTRs. Upper brackets denote significant differences for all STRs (white) across categories or for significant differences within each category between all STRs (white) and FM-eSTRs (black).

**Figure S7.** Related to Figure 5

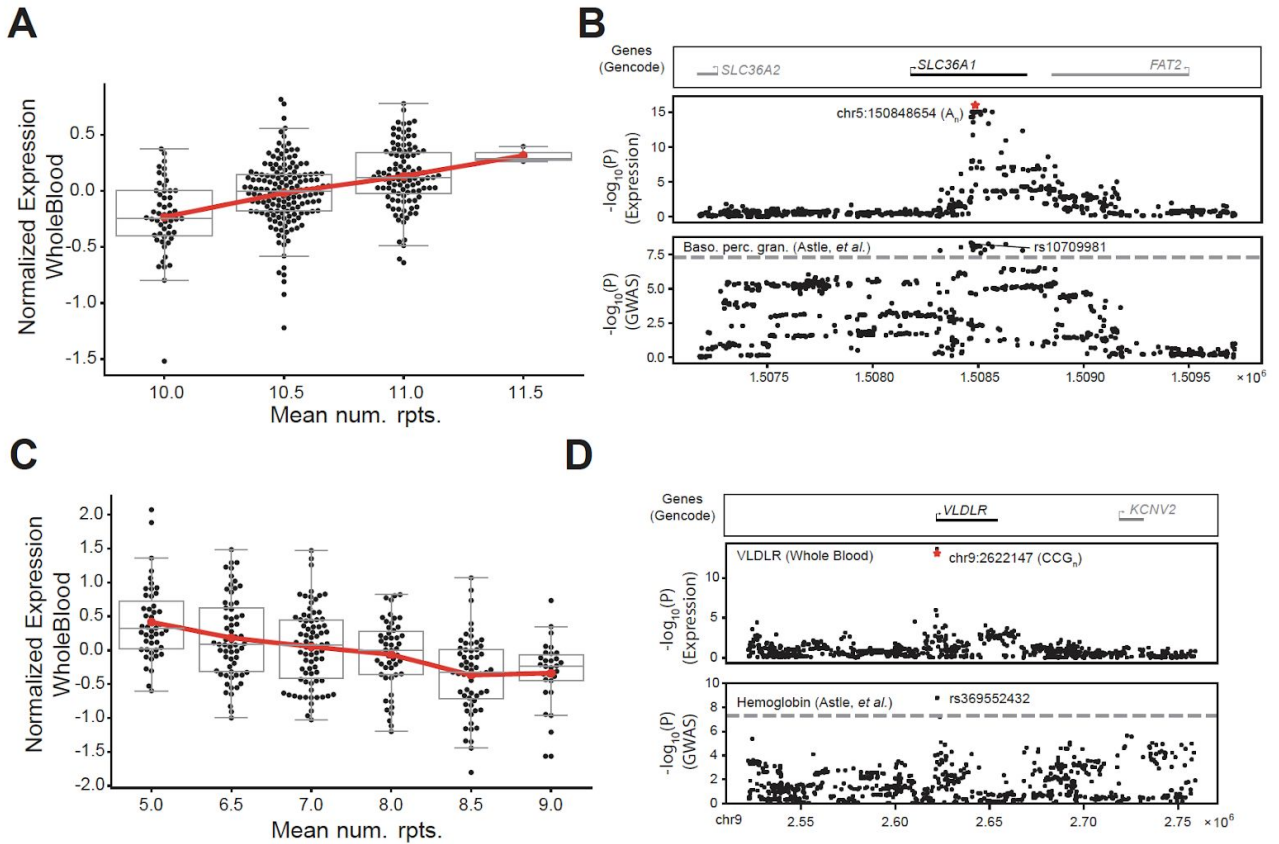

**Example GWAS signals falling within FM-eSTRs. A.,C. eSTR associations for candidate FM-eSTRs underlying GWAS signals.** For each plot, the x-axis shows STR genotype as the mean number of repeats, and the y-axis shows normalized expression. Each point represents a single individual. Red lines show the mean expression for each x-axis value. Boxplots summarize the expression distribution for each genotype as described in **Figure 1D**. Gene diagrams are not drawn to scale. **A.** shows association between a homopolymer A/T STR (chr5:150848654) and *SLC36A1*. **B.** shows association between a CCG STR (chr9:2622147) and *VLDLR*. **B.,D. Summary statistics for gene expression and GWAS signals.** Top panels show genes in each region. The target gene for the eQTL associations is shown in black. Middle panels show the  $-\log_{10}$  p-values of association between each variant and the expression of the target gene. The FM-eSTR is denoted by a red star. Bottom panels show the  $-\log_{10}$  p-values of association from published GWAS for each trait. Dashed gray horizontal lines show the genome-wide significance threshold of  $5e-8$ . **B.** shows eQTL signals for *SLC36A1* (middle) and GWAS signals for basophil percentage of granulocytes (bottom). **D.** shows eQTL signals for *VLDLR* in whole blood (middle) and GWAS signals for hemoglobin (bottom).



**Table S1.** Related to Figure 1

| <b>Tissue</b>           | <b>Sample size</b> | <b># eSTRs<br/>(FDR&gt;10%)</b> | <b># FM-eSTRs<br/>(CAVIAR score&gt;0.1)</b> |
|-------------------------|--------------------|---------------------------------|---------------------------------------------|
| Tibial Nerve            | 265                | 4,352                           | 312                                         |
| Thyroid                 | 262                | 4,105                           | 330                                         |
| Sun-exposed Skin        | 297                | 3,827                           | 298                                         |
| Subcutaneous Adipose    | 270                | 3,587                           | 292                                         |
| Tibial Artery           | 276                | 3,454                           | 269                                         |
| Esophagus Mucosa        | 255                | 3,461                           | 286                                         |
| Skeletal Muscle         | 343                | 3,370                           | 272                                         |
| Transformed Fibroblasts | 225                | 3,088                           | 248                                         |
| Lung                    | 259                | 2,989                           | 277                                         |
| Esophagus Muscularis    | 214                | 2,824                           | 256                                         |
| Whole Blood             | 336                | 2,585                           | 206                                         |
| Aorta Artery            | 191                | 2,396                           | 234                                         |
| Non-exposed Skin        | 209                | 2,386                           | 200                                         |
| Visceral Adipose        | 193                | 1,840                           | 175                                         |
| Heart-Left Ventricle    | 199                | 1,731                           | 212                                         |
| Brain-Cerebellum        | 107                | 1,551                           | 191                                         |
| Brain-Caudate           | 108                | 675                             | 103                                         |

**Summary of multi-tissue eSTR identification.**

**Table S2.** Related to Figure 1

| Gene                                     | STR (hg19)                                  | Reference effect                                                                                                                                                        | GTE <sub>x</sub> eSTR evidence (p<0.01)                                                                                                                                                                                                                                                                                                                                                                                                                                                                                                                                                                                                                                                                                                                                                                                             |
|------------------------------------------|---------------------------------------------|-------------------------------------------------------------------------------------------------------------------------------------------------------------------------|-------------------------------------------------------------------------------------------------------------------------------------------------------------------------------------------------------------------------------------------------------------------------------------------------------------------------------------------------------------------------------------------------------------------------------------------------------------------------------------------------------------------------------------------------------------------------------------------------------------------------------------------------------------------------------------------------------------------------------------------------------------------------------------------------------------------------------------|
| <i>CSTB</i><br>(Borel et al., 2012)      | 21:45196326<br>(CGGGGCGGGGCG <sub>n</sub> ) | Expansion implicated in myoclonus epilepsy. Normal alleles show increasing effect in LCLs ( $\beta > 0$ ).                                                              | <b>Adipose-Visceral; p=2.5e-6; <math>\beta=0.34</math></b><br><b>Transformedfibroblasts; p=1.5e-18; <math>\beta=0.55</math></b><br><b>Skin-SunExposed; p=1.89e-14; <math>\beta=0.43</math></b><br><b>Heart-LeftVentricle; p=1.6e-11; <math>\beta=0.46</math></b><br><b>Esophagus-Muscularis; p=2.8e-9; <math>\beta=0.40</math></b><br><b>Artery-Tibial; p= 2.3e-15; <math>\beta=0.46</math></b><br><b>Artery-Aorta; p=2.0e-5; <math>\beta=0.31</math></b><br><b>Adipose-Subcutaneous; p=1.9e-4; <math>\beta=0.23</math></b><br><b>Skin-NotSunExposed; p=6.3e-7; <math>\beta=0.34</math></b><br><b>Thyroid; p=4.1e-16; <math>\beta=0.48</math></b><br><b>WholeBlood; p=2.1e-14; <math>\beta=0.41</math></b><br><b>Nerve-Tibial; p=7.3e-14; <math>\beta=0.45</math></b><br><b>Muscle-Skeletal; p=1.3e-21; <math>\beta=0.49</math></b> |
| <i>NOP56</i><br>(Matsuzono et al., 2017) | 20:2633379<br>(GGCCTG <sub>n</sub> )        | Expansion implicated in spinocerebellar ataxia 36. Large expansions show decreasing effect in SCA36 patient iPSC cell lines ( $\beta < 0$ ). No data on normal alleles. | Skin-SunExposed; p= 6.0e-05; $\beta=0.23$<br>Artery-Tibial; p=9.5e-5; $\beta=0/24$<br>Adipose-Subcutaneous; p=0.0011; $\beta=0.20$<br>Skin-NotSunExposed; p=0.0039; $\beta=0.21$<br>Thyroid; p=2.4e-8; $\beta=0.34$<br>Muscle-Skeletal; p=7.8e-12; $\beta=0.36$                                                                                                                                                                                                                                                                                                                                                                                                                                                                                                                                                                     |
| <i>MMP9</i><br>(Shimajiri et al., 1999)  | 20:44637413 (AC <sub>n</sub> )              | Increasing effect in esophageal carcinoma cell lines ( $\beta > 0$ ).                                                                                                   | <b>Skin-SunExposed; p=0.0039; <math>\beta=0.18</math></b>                                                                                                                                                                                                                                                                                                                                                                                                                                                                                                                                                                                                                                                                                                                                                                           |
| <i>EGFR</i><br>(Gebhardt et al., 1999)   | 7:55088254 (AC <sub>n</sub> )               | <i>In vitro</i> decreasing effect; decreasing but non-linear effect across various cell lines ( $\beta < 0$ ).                                                          | <b>Heart-LeftVentricle; p=0.0073; <math>\beta=-0.21</math></b><br>Esophagus-Mucosa; p=0.0018; $\beta=0.21$<br>Muscle-Skeletal; p=0.0070; $\beta=0.16$                                                                                                                                                                                                                                                                                                                                                                                                                                                                                                                                                                                                                                                                               |
| <i>TP53/3</i><br>(Contente et al., 2002) | 2:24307211 (TGYCC <sub>n</sub> )            | Increasing effect in presence of p53 in H1299 cells ( $\beta > 0$ ).                                                                                                    | <b>Esophagus-Mucosa; p=0.0081; <math>\beta=0.18</math></b><br><b>Thyroid; p=0.00060; <math>\beta=0.22</math></b><br><b>Muscle-Skeletal; p=0.0068; <math>\beta=0.15</math></b>                                                                                                                                                                                                                                                                                                                                                                                                                                                                                                                                                                                                                                                       |
| <i>ALOX5</i><br>(Vikman et al., 2009)    | 10:45869549<br>(CGGGGG <sub>n</sub> )       | Increasing effect in monocytes ( $\beta > 0$ ), decreasing effect in lymphocytes ( $\beta < 0$ ).                                                                       | <b>Esophagus-Mucosa; p=4.35e-7; <math>\beta=0.32</math></b><br><b>Brain-Cerebellum; p=0.0027; <math>\beta=0.29</math></b><br><b>Skin-SunExposed; p=9.0e-4; <math>\beta=-0.19</math></b>                                                                                                                                                                                                                                                                                                                                                                                                                                                                                                                                                                                                                                             |
| <i>IFNG</i><br>(Saha et al., 2005)       | 12:68552495 (AC <sub>n</sub> )              | <i>In vitro</i> reporter assay showed increasing effect for CA12 vs. CA15 ( $\beta > 0$ ).                                                                              | No GTE <sub>x</sub> eSTRs found                                                                                                                                                                                                                                                                                                                                                                                                                                                                                                                                                                                                                                                                                                                                                                                                     |
| <i>UGT1A1</i><br>(Johnson et al., 2009)  | 2:234668880 (AT <sub>n</sub> )              | Decreasing effect in human hepatoma ( $\beta < 0$ )                                                                                                                     | No GTE <sub>x</sub> eSTRs found                                                                                                                                                                                                                                                                                                                                                                                                                                                                                                                                                                                                                                                                                                                                                                                                     |

**STRs previously associated with expression that were analyzed in the GTEx cohort.** The right hand column reports STR by gene associations in the GTEx cohort with nominal  $p < 0.01$ . Nominal p-values and effect sizes ( $\beta$ ) are given for each eSTR. Bolded results in the right column indicate eSTRs that agree with the direction of effect reported previously. Note several previously reported eSTRs (e.g. a TG repeat in the promoter of *HMOX1* (Køllgaard et al., 2016) and a TC repeat in the promoter of *HMGA2* (Borrmann et al., 2003)) did not pass our quality filters and thus were not included.

**Table S3.** Related to Figure 2

| Annotation                                     | # STRs |        |          | eSTR enrichment |      | FM-eSTR enrichment |      |
|------------------------------------------------|--------|--------|----------|-----------------|------|--------------------|------|
|                                                | All    | eSTRs  | FM-eSTRs | P-val           | OR   | P-val              | OR   |
| Coding                                         | 217    | 75     | 16       | 4.0e-19         | 4.1  | 5.0e-6             | 4.1  |
| 5' UTR                                         | 657    | 197    | 56       | 1.9e-37         | 3.3  | 2.8e-20            | 4.9  |
| 3' UTR                                         | 1,660  | 468    | 100      | 3.1e-77         | 3.1  | 2.6e-23            | 3.4  |
| Intron                                         | 74,501 | 10,998 | 1,759    | 1.4e-294        | 1.7  | 1.1e-33            | 1.5  |
| Intergenic                                     | 91,325 | 6,458  | 1,016    | p<1e-300        | 0.39 | 2.5e-142           | 0.40 |
| Promoter<br>(within 3kb<br>upstream of<br>TSS) | 6,866  | 1,941  | 380      | p<1e-300        | 3.2  | 7.9e-77            | 3.2  |

**Enrichment of eSTRs for genomic annotations.** For each annotation, a Fisher's exact test was performed to test whether eSTRs showed significantly more or less overlap compared to all STRs analyzed. FM-eSTRs represent all eSTRs with CAVIAR score of at least 10% as defined in the main text. OR=odds ratio and p-values are two-sided. Each STR was assigned to at most one category as described in the **Methods**.

**Table S4.** Related to Figure 2

| Factor | # STRs |       |          | eSTR enrichment |      | FM-eSTR enrichment |      |
|--------|--------|-------|----------|-----------------|------|--------------------|------|
|        | All    | eSTRs | FM-eSTRs | P-val           | OR   | P-val              | OR   |
| KDM5A  | 13     | 8     | 6        | 2.3E-05         | 12.3 | 7.1E-08            | 44.4 |
| RDBP   | 9      | 5     | 3        | 1.7E-03         | 9.6  | 5.3E-04            | 25.9 |
| THAP1  | 32     | 19    | 6        | 1.1E-10         | 11.3 | 2.8E-05            | 11.9 |
| SAP30  | 170    | 72    | 27       | 2.0E-24         | 5.7  | 3.8E-17            | 9.8  |
| SIX5   | 99     | 42    | 15       | 6.3E-15         | 5.7  | 7.0E-10            | 9.3  |
| PHF8   | 462    | 198   | 68       | 2.4E-65         | 5.8  | 1.0E-38            | 9.1  |
| ELK4   | 111    | 46    | 15       | 9.9E-16         | 5.5  | 3.6E-09            | 8.1  |
| NRF1   | 127    | 47    | 17       | 8.0E-14         | 4.5  | 3.9E-10            | 8.0  |
| KDM5B  | 321    | 137   | 42       | 1.8E-45         | 5.8  | 1.8E-22            | 7.9  |
| SREBP1 | 38     | 17    | 5        | 2.8E-07         | 6.2  | 7.3E-04            | 7.8  |
| CTCFL  | 62     | 16    | 8        | 1.9E-03         | 2.7  | 2.3E-05            | 7.7  |
| NFYA   | 81     | 29    | 10       | 1.0E-08         | 4.3  | 3.3E-06            | 7.3  |
| HMGN3  | 310    | 126   | 38       | 2.9E-39         | 5.3  | 1.7E-19            | 7.3  |
| E2F6   | 416    | 159   | 50       | 5.0E-45         | 4.8  | 9.2E-25            | 7.2  |
| CREB1  | 241    | 93    | 29       | 2.2E-27         | 4.9  | 5.1E-15            | 7.1  |
| SP4    | 117    | 54    | 14       | 8.1E-21         | 6.6  | 5.7E-08            | 7.0  |
| ZBTB7A | 315    | 113   | 36       | 1.3E-29         | 4.3  | 1.5E-17            | 6.7  |
| CEBPD  | 175    | 66    | 20       | 2.8E-19         | 4.7  | 2.1E-10            | 6.7  |
| GTF2B  | 44     | 17    | 5        | 3.3E-06         | 4.9  | 1.4E-03            | 6.6  |
| CCNT2  | 401    | 143   | 45       | 1.1E-36         | 4.3  | 3.1E-21            | 6.6  |
| HDAC1  | 244    | 92    | 27       | 3.1E-26         | 4.7  | 3.3E-13            | 6.5  |
| ELK1   | 141    | 50    | 15       | 9.1E-14         | 4.2  | 9.5E-08            | 6.2  |
| TAF7   | 196    | 79    | 20       | 6.0E-25         | 5.2  | 1.5E-09            | 5.9  |

|         |     |     |    |         |     |         |     |
|---------|-----|-----|----|---------|-----|---------|-----|
| IRF1    | 430 | 147 | 43 | 2.7E-35 | 4.0 | 1.9E-18 | 5.8 |
| SIN3A   | 585 | 185 | 58 | 1.1E-38 | 3.6 | 3.6E-24 | 5.8 |
| E2F4    | 295 | 96  | 29 | 7.2E-22 | 3.7 | 9.3E-13 | 5.7 |
| ZKSCAN1 | 72  | 16  | 7  | 8.5E-03 | 2.2 | 4.4E-04 | 5.6 |
| SRF     | 159 | 41  | 15 | 5.6E-07 | 2.7 | 4.6E-07 | 5.4 |
| TAF1    | 937 | 298 | 85 | 5.7E-62 | 3.6 | 6.4E-32 | 5.3 |
| GABPA   | 586 | 180 | 53 | 7.4E-36 | 3.4 | 2.0E-20 | 5.2 |
| E2F1    | 604 | 190 | 54 | 2.4E-39 | 3.6 | 1.5E-20 | 5.1 |
| MAZ     | 992 | 314 | 85 | 1.1E-64 | 3.6 | 3.7E-30 | 4.9 |
| RBBP5   | 710 | 216 | 61 | 5.6E-42 | 3.4 | 4.0E-22 | 4.9 |
| NFYB    | 200 | 57  | 17 | 7.7E-11 | 3.1 | 3.6E-07 | 4.8 |
| UBTF    | 273 | 88  | 23 | 7.0E-20 | 3.7 | 4.0E-09 | 4.8 |
| ETS1    | 250 | 88  | 21 | 8.9E-23 | 4.2 | 2.0E-08 | 4.8 |
| ZEB1    | 60  | 17  | 5  | 3.1E-04 | 3.0 | 5.7E-03 | 4.7 |
| EGR1    | 658 | 186 | 54 | 1.3E-31 | 3.1 | 7.0E-19 | 4.7 |
| SMARCB1 | 257 | 89  | 21 | 1.9E-22 | 4.1 | 3.2E-08 | 4.6 |
| SP2     | 37  | 12  | 3  | 6.1E-04 | 3.7 | 3.3E-02 | 4.6 |
| CHD1    | 512 | 144 | 41 | 9.9E-25 | 3.0 | 2.4E-14 | 4.5 |
| CHD2    | 624 | 177 | 49 | 1.6E-30 | 3.1 | 1.6E-16 | 4.5 |
| BRCA1   | 116 | 38  | 9  | 1.1E-09 | 3.8 | 3.9E-04 | 4.4 |
| FOXP2   | 572 | 141 | 44 | 2.0E-18 | 2.5 | 1.1E-14 | 4.3 |
| PML     | 642 | 175 | 49 | 7.3E-28 | 2.9 | 5.0E-16 | 4.3 |
| HDAC2   | 472 | 132 | 36 | 1.4E-22 | 3.0 | 3.6E-12 | 4.3 |
| TCF3    | 342 | 93  | 26 | 2.2E-15 | 2.9 | 3.6E-09 | 4.3 |
| MXI1    | 786 | 218 | 59 | 2.0E-35 | 3.0 | 1.2E-18 | 4.3 |
| ELF1    | 665 | 200 | 50 | 3.4E-38 | 3.3 | 4.6E-16 | 4.2 |
| POU2F2  | 492 | 125 | 37 | 9.8E-18 | 2.6 | 2.8E-12 | 4.2 |

|          |       |       |     |          |     |         |     |
|----------|-------|-------|-----|----------|-----|---------|-----|
| SIN3AK20 | 900   | 263   | 67  | 3.8E-47  | 3.2 | 8.9E-21 | 4.2 |
| MBD4     | 165   | 46    | 12  | 9.3E-09  | 3.0 | 8.4E-05 | 4.1 |
| TBP      | 834   | 218   | 59  | 1.6E-31  | 2.7 | 1.9E-17 | 4.0 |
| PAX5     | 594   | 161   | 41  | 1.8E-25  | 2.9 | 2.9E-12 | 3.9 |
| MEF2C    | 159   | 32    | 11  | 1.6E-03  | 1.9 | 2.5E-04 | 3.8 |
| STAT1    | 392   | 107   | 27  | 1.1E-17  | 2.9 | 1.5E-08 | 3.8 |
| STAT2    | 58    | 17    | 4   | 2.0E-04  | 3.2 | 2.4E-02 | 3.8 |
| SMARCC2  | 60    | 15    | 4   | 3.4E-03  | 2.6 | 2.7E-02 | 3.7 |
| GTF2F1   | 301   | 79    | 19  | 1.4E-12  | 2.7 | 6.7E-06 | 3.5 |
| RFX5     | 430   | 97    | 27  | 9.4E-11  | 2.2 | 9.6E-08 | 3.5 |
| BCLAF1   | 225   | 53    | 14  | 3.2E-07  | 2.4 | 1.2E-04 | 3.4 |
| RELA     | 897   | 216   | 55  | 4.0E-26  | 2.5 | 8.4E-14 | 3.4 |
| TFAP2A   | 390   | 83    | 24  | 2.8E-08  | 2.1 | 6.9E-07 | 3.4 |
| SP1      | 758   | 191   | 46  | 9.3E-26  | 2.6 | 1.2E-11 | 3.4 |
| YY1      | 1,187 | 278   | 71  | 6.5E-31  | 2.4 | 8.0E-17 | 3.3 |
| REST     | 952   | 209   | 57  | 5.0E-20  | 2.2 | 8.0E-14 | 3.3 |
| TBL1XR1  | 449   | 110   | 27  | 1.7E-14  | 2.5 | 2.3E-07 | 3.3 |
| ZBTB33   | 234   | 64    | 14  | 3.7E-11  | 2.9 | 1.8E-04 | 3.3 |
| MYBL2    | 438   | 109   | 26  | 7.2E-15  | 2.6 | 4.8E-07 | 3.3 |
| POLR2A   | 4,645 | 1,118 | 262 | 1.1E-130 | 2.5 | 4.1E-54 | 3.3 |
| FOSL1    | 170   | 35    | 10  | 6.4E-04  | 2.0 | 1.6E-03 | 3.2 |
| BHLHE40  | 757   | 170   | 44  | 1.3E-17  | 2.2 | 1.3E-10 | 3.2 |
| MTA3     | 353   | 83    | 20  | 2.7E-10  | 2.4 | 1.9E-05 | 3.1 |
| MYC      | 1,984 | 460   | 110 | 4.0E-49  | 2.4 | 1.1E-22 | 3.1 |
| RXRA     | 249   | 63    | 14  | 1.5E-09  | 2.6 | 3.4E-04 | 3.1 |
| WRNIP1   | 254   | 63    | 14  | 4.5E-09  | 2.5 | 4.2E-04 | 3.0 |
| NR2C2    | 145   | 30    | 8   | 1.5E-03  | 2.0 | 6.8E-03 | 3.0 |

|         |       |     |    |         |     |         |     |
|---------|-------|-----|----|---------|-----|---------|-----|
| ZNF143  | 620   | 139 | 34 | 1.3E-14 | 2.2 | 6.2E-08 | 3.0 |
| MAX     | 1,718 | 429 | 92 | 6.9E-55 | 2.6 | 3.0E-18 | 3.0 |
| USF2    | 279   | 64  | 15 | 8.0E-08 | 2.3 | 3.4E-04 | 2.9 |
| NR3C1   | 467   | 94  | 25 | 8.1E-08 | 1.9 | 4.9E-06 | 2.9 |
| STAT5A  | 474   | 96  | 25 | 4.4E-08 | 2.0 | 6.4E-06 | 2.9 |
| USF1    | 665   | 153 | 35 | 5.2E-17 | 2.3 | 1.1E-07 | 2.9 |
| TFAP2C  | 504   | 112 | 26 | 8.5E-12 | 2.2 | 6.2E-06 | 2.8 |
| MEF2A   | 340   | 64  | 17 | 7.9E-05 | 1.8 | 3.3E-04 | 2.7 |
| ARID3A  | 542   | 116 | 27 | 5.0E-11 | 2.1 | 7.8E-06 | 2.7 |
| SMARCA4 | 120   | 24  | 6  | 6.1E-03 | 1.9 | 2.7E-02 | 2.7 |
| RCOR1   | 805   | 177 | 40 | 3.1E-17 | 2.2 | 6.5E-08 | 2.7 |
| NFIC    | 1,161 | 222 | 57 | 3.3E-14 | 1.8 | 1.9E-10 | 2.7 |
| HNF4A   | 266   | 60  | 13 | 3.4E-07 | 2.2 | 1.9E-03 | 2.7 |
| BACH1   | 226   | 54  | 11 | 1.7E-07 | 2.4 | 4.3E-03 | 2.6 |
| CBX3    | 392   | 100 | 19 | 1.6E-14 | 2.6 | 2.3E-04 | 2.6 |
| CTBP2   | 207   | 44  | 10 | 6.7E-05 | 2.1 | 6.6E-03 | 2.6 |
| JUNB    | 228   | 51  | 11 | 3.2E-06 | 2.2 | 4.6E-03 | 2.6 |
| EZH2    | 858   | 153 | 41 | 4.9E-08 | 1.7 | 2.0E-07 | 2.6 |
| TCF12   | 813   | 167 | 38 | 1.2E-13 | 2.0 | 7.8E-07 | 2.6 |
| RUNX3   | 1,193 | 238 | 55 | 2.6E-17 | 1.9 | 3.6E-09 | 2.5 |
| SMARCC1 | 240   | 51  | 11 | 1.6E-05 | 2.1 | 6.7E-03 | 2.5 |
| GTF3C2  | 111   | 29  | 5  | 1.7E-05 | 2.7 | 6.1E-02 | 2.4 |
| ATF3    | 313   | 82  | 14 | 8.7E-13 | 2.7 | 3.0E-03 | 2.4 |
| EBF1    | 682   | 129 | 30 | 1.7E-08 | 1.8 | 2.9E-05 | 2.4 |
| FOXM1   | 548   | 123 | 24 | 4.6E-13 | 2.2 | 2.0E-04 | 2.4 |
| TRIM28  | 228   | 56  | 10 | 3.2E-08 | 2.5 | 1.3E-02 | 2.4 |
| BATF    | 390   | 64  | 17 | 4.0E-03 | 1.5 | 2.1E-03 | 2.4 |



|        |       |     |    |         |     |         |     |
|--------|-------|-----|----|---------|-----|---------|-----|
| GATA1  | 668   | 165 | 29 | 1.6E-21 | 2.5 | 4.9E-05 | 2.4 |
| ATF1   | 161   | 43  | 7  | 9.1E-08 | 2.8 | 3.5E-02 | 2.4 |
| FOSL2  | 719   | 145 | 31 | 2.1E-11 | 2.0 | 4.5E-05 | 2.3 |
| ZNF263 | 814   | 167 | 35 | 1.2E-13 | 2.0 | 1.3E-05 | 2.3 |
| FOXA2  | 584   | 108 | 25 | 6.7E-07 | 1.8 | 2.0E-04 | 2.3 |
| PBX3   | 213   | 52  | 9  | 1.3E-07 | 2.5 | 2.1E-02 | 2.3 |
| JUND   | 1,707 | 312 | 71 | 1.6E-16 | 1.7 | 1.9E-09 | 2.3 |
| TCF7L2 | 1,256 | 224 | 52 | 3.8E-11 | 1.7 | 3.6E-07 | 2.3 |
| HNF4G  | 225   | 47  | 9  | 5.5E-05 | 2.0 | 4.3E-02 | 2.2 |
| TEAD4  | 987   | 187 | 39 | 9.5E-12 | 1.8 | 3.0E-05 | 2.1 |
| ZZZ3   | 76    | 10  | 3  | 5.9E-01 | 1.2 | 1.8E-01 | 2.1 |
| BCL3   | 948   | 182 | 37 | 5.1E-12 | 1.8 | 6.0E-05 | 2.1 |
| SPI1   | 795   | 167 | 30 | 1.6E-14 | 2.1 | 5.6E-04 | 2.0 |
| FOXA1  | 1,309 | 216 | 49 | 6.2E-08 | 1.5 | 1.5E-05 | 2.0 |
| NR2F2  | 244   | 52  | 9  | 1.2E-05 | 2.1 | 5.4E-02 | 2.0 |
| ATF2   | 697   | 147 | 25 | 4.5E-13 | 2.1 | 3.0E-03 | 1.9 |
| SMC3   | 737   | 144 | 26 | 2.8E-10 | 1.9 | 2.7E-03 | 1.9 |
| SETDB1 | 709   | 118 | 25 | 4.4E-05 | 1.5 | 3.4E-03 | 1.9 |
| ESR1   | 284   | 43  | 10 | 6.2E-02 | 1.4 | 7.5E-02 | 1.9 |
| EP300  | 2,558 | 413 | 88 | 1.4E-12 | 1.5 | 1.7E-07 | 1.9 |
| NFATC1 | 551   | 109 | 18 | 2.0E-08 | 1.9 | 2.7E-02 | 1.7 |
| IKZF1  | 252   | 46  | 8  | 1.5E-03 | 1.7 | 1.6E-01 | 1.7 |
| CTCF   | 2,746 | 522 | 86 | 7.3E-31 | 1.8 | 1.1E-05 | 1.7 |
| IRF4   | 317   | 49  | 10 | 3.4E-02 | 1.4 | 9.9E-02 | 1.7 |
| GATA2  | 1,628 | 240 | 49 | 6.6E-05 | 1.3 | 1.9E-03 | 1.6 |
| ZNF217 | 299   | 37  | 9  | 6.5E-01 | 1.1 | 1.9E-01 | 1.6 |
| BCL11A | 271   | 38  | 8  | 1.8E-01 | 1.3 | 1.8E-01 | 1.6 |

|        |       |     |    |         |     |         |     |
|--------|-------|-----|----|---------|-----|---------|-----|
| TAL1   | 309   | 64  | 9  | 2.8E-06 | 2.0 | 2.0E-01 | 1.6 |
| SUZ12  | 421   | 73  | 12 | 4.0E-04 | 1.6 | 1.5E-01 | 1.5 |
| JUN    | 923   | 157 | 26 | 6.1E-07 | 1.6 | 5.1E-02 | 1.5 |
| CEBPB  | 2,329 | 405 | 64 | 2.9E-17 | 1.6 | 4.5E-03 | 1.5 |
| KAP1   | 1,024 | 172 | 28 | 4.8E-07 | 1.6 | 6.4E-02 | 1.5 |
| RPC155 | 117   | 23  | 3  | 8.7E-03 | 1.9 | 4.9E-01 | 1.4 |
| GATA3  | 1,134 | 139 | 29 | 4.3E-01 | 1.1 | 1.0E-01 | 1.4 |
| STAT3  | 1,069 | 159 | 27 | 7.5E-04 | 1.3 | 1.4E-01 | 1.3 |
| RAD21  | 1,247 | 205 | 30 | 1.7E-07 | 1.5 | 1.8E-01 | 1.3 |
| MAFF   | 646   | 94  | 13 | 1.9E-02 | 1.3 | 7.7E-01 | 1.1 |
| FOS    | 2,045 | 278 | 39 | 3.4E-03 | 1.2 | 9.4E-01 | 1.0 |
| MAFK   | 1,176 | 156 | 21 | 6.0E-02 | 1.2 | 9.1E-01 | 0.9 |

**Enrichment of eSTRs in binding sites for transcription factors and chromatin regulators annotated by ENCODE.** For each factor, a Fisher's exact test was performed to test whether eSTRs showed significantly more or less overlap compared to all STRs analyzed. FM-STRs represent all eSTRs with CAVIAR score of at least 10% as defined in the main text. OR=odds ratio and p-values are two-sided. Transcription factor annotations are described in **Methods**.

**Table S5.** Related to Figure 2

| <b>Gene</b>    | <b>Chrom</b> | <b>STR position (hg19)</b> | <b>Motif</b> | <b>Top CAVIAR score</b> | <b>Top tissue</b>                               |
|----------------|--------------|----------------------------|--------------|-------------------------|-------------------------------------------------|
| <i>DHRS1</i>   | chr14        | 24769851                   | CCT          | 1.00                    | Thyroid ( $\beta=-0.42$ )                       |
| <i>AGTPBP1</i> | chr9         | 88356816                   | CCG          | 1.00                    | Cells-Transfor medfibroblasts ( $\beta=0.36$ )  |
| <i>RPL14</i>   | chr3         | 40503522                   | CTG          | 0.99                    | Nerve-Tibial ( $\beta=-0.32$ )                  |
| <i>SMPD1</i>   | chr11        | 6411932                    | CGCTGG       | 0.79                    | Thyroid ( $\beta=0.27$ )                        |
| <i>POMC</i>    | chr2         | 25384461                   | AGC          | 0.59                    | Muscle-Skelet al ( $\beta=0.35$ )               |
| <i>HSPBP1</i>  | chr19        | 55790888                   | CGG          | 0.58                    | Cells-Transfor medfibroblasts ( $\beta=-0.37$ ) |
| <i>ROBO3</i>   | chr11        | 124750441                  | AGCCGG       | 0.39                    | Thyroid ( $\beta=0.33$ )                        |
| <i>MAGEF1</i>  | chr3         | 184429135                  | AGG          | 0.38                    | Thyroid ( $\beta=-0.33$ )                       |
| <i>PRR12A</i>  | chr19        | 50093219                   | ACCCCC       | 0.36                    | Skin-SunExpo sed ( $\beta=0.51$ )               |
| <i>EPOR</i>    | chr19        | 11558342                   | CCT          | 0.29                    | Heart-LeftVent ricle ( $\beta=0.28$ )           |
| <i>TOM1L2</i>  | chr17        | 17697095                   | CTG          | 0.22                    | Lung ( $\beta=0.28$ )                           |
| <i>IST1</i>    | chr16        | 71956508                   | ATGCCC       | 0.20                    | Artery-Aorta ( $\beta=0.27$ )                   |
| <i>MRPS26</i>  | chr20        | 3026347                    | CCCCG        | 0.17                    | Nerve-Tibial ( $\beta=0.32$ )                   |
| <i>ZNF219</i>  | chr14        | 21560753                   | AGCCTC       | 0.14                    | Adipose-Subcu taneous ( $\beta=0.22$ )          |

|               |       |          |     |      |                                   |
|---------------|-------|----------|-----|------|-----------------------------------|
| <i>DLX5</i>   | chr7  | 96635365 | CTG | 0.12 | Muscle-Skeletal ( $\beta=-0.21$ ) |
| <i>MCM3AP</i> | chr21 | 47721987 | ACC | 0.11 | Artery-Aorta ( $\beta=0.46$ )     |

**FM-eSTRs overlapping protein-coding regions.** The CAVIAR score and eSTR effect size ( $\beta$ ) are given for the tissue with highest CAVIAR score. FM-eSTRs are ordered based on the CAVIAR score.

**Table S6.** Related to Figure 2

| Canonical motif | # STRs |       |          | eSTR enrichment |     | FM-eSTR enrichment |      |
|-----------------|--------|-------|----------|-----------------|-----|--------------------|------|
|                 | All    | eSTRs | FM-eSTRs | P-val           | OR  | P-val              | OR   |
| CCCGG           | 13     | 7     | 3        | 2.4E-04         | 9.0 | 1.7E-03            | 15.5 |
| CCCCG           | 41     | 18    | 9        | 1.8E-07         | 6.0 | 6.4E-08            | 14.6 |
| CCCCCG          | 24     | 11    | 4        | 2.7E-05         | 6.5 | 1.0E-03            | 10.3 |
| AGGCGG          | 18     | 8     | 3        | 4.6E-04         | 6.2 | 4.5E-03            | 10.3 |
| AGCCCC          | 35     | 11    | 5        | 1.4E-03         | 3.5 | 5.0E-04            | 8.6  |
| CCCCGG          | 23     | 11    | 3        | 1.6E-05         | 7.1 | 9.1E-03            | 7.8  |
| CCG             | 210    | 66    | 22       | 1.0E-14         | 3.5 | 1.4E-10            | 6.1  |
| AAAAG           | 213    | 39    | 11       | 3.4E-03         | 1.7 | 2.8E-03            | 2.8  |
| AGC             | 293    | 55    | 10       | 3.1E-04         | 1.8 | 7.9E-02            | 1.8  |
| AATC            | 271    | 48    | 9        | 2.2E-03         | 1.7 | 1.1E-01            | 1.8  |
| C               | 1,163  | 165   | 38       | 4.8E-03         | 1.3 | 1.6E-03            | 1.8  |
| AATT            | 268    | 50    | 8        | 5.3E-04         | 1.8 | 1.8E-01            | 1.6  |
| ACC             | 250    | 32    | 7        | 4.9E-01         | 1.1 | 2.5E-01            | 1.5  |
| AAAG            | 1,854  | 261   | 49       | 6.5E-04         | 1.3 | 2.6E-02            | 1.4  |
| AAAT            | 8,806  | 1,306 | 218      | 2.5E-22         | 1.4 | 8.5E-05            | 1.3  |
| AAAAC           | 3,289  | 485   | 77       | 1.2E-08         | 1.3 | 7.0E-02            | 1.2  |
| AGAGGG          | 220    | 46    | 5        | 7.2E-05         | 2.0 | 6.2E-01            | 1.2  |
| AAAC            | 7,779  | 1,158 | 173      | 2.1E-20         | 1.4 | 3.4E-02            | 1.2  |
| AAAAG           | 491    | 67    | 11       | 1.4E-01         | 1.2 | 5.1E-01            | 1.2  |
| ACAG            | 187    | 23    | 4        | 7.3E-01         | 1.1 | 7.8E-01            | 1.1  |
| AGG             | 481    | 83    | 10       | 1.8E-04         | 1.6 | 7.4E-01            | 1.1  |
| A               | 64,118 | 7,922 | 1,276    | 1.0E-17         | 1.1 | 3.4E-02            | 1.1  |
| AAAAT           | 1,738  | 267   | 33       | 1.0E-06         | 1.4 | 1.0E+00            | 1.0  |
| AAC             | 3,347  | 501   | 61       | 8.3E-10         | 1.4 | 8.0E-01            | 1.0  |

|        |        |       |     |         |     |         |     |
|--------|--------|-------|-----|---------|-----|---------|-----|
| AC     | 48,732 | 4,389 | 841 | 4.2E-95 | 0.7 | 9.6E-04 | 0.9 |
| AAGG   | 1,227  | 103   | 20  | 4.5E-04 | 0.7 | 6.0E-01 | 0.9 |
| AATG   | 1,274  | 170   | 20  | 4.2E-02 | 1.2 | 4.7E-01 | 0.8 |
| ATCC   | 930    | 79    | 14  | 3.3E-03 | 0.7 | 4.7E-01 | 0.8 |
| AAAAAC | 1,018  | 156   | 15  | 2.1E-04 | 1.4 | 4.2E-01 | 0.8 |
| AAT    | 2,915  | 362   | 43  | 1.1E-01 | 1.1 | 1.0E-01 | 0.8 |
| AGGG   | 348    | 39    | 5   | 9.3E-01 | 1.0 | 6.9E-01 | 0.8 |
| AAAAAT | 498    | 71    | 7   | 5.7E-02 | 1.3 | 5.1E-01 | 0.7 |
| ACAT   | 656    | 91    | 9   | 5.7E-02 | 1.2 | 3.9E-01 | 0.7 |
| AT     | 7,950  | 703   | 103 | 5.2E-15 | 0.7 | 2.5E-05 | 0.7 |
| ATC    | 725    | 69    | 9   | 1.0E-01 | 0.8 | 2.2E-01 | 0.6 |
| AGAT   | 3,461  | 187   | 42  | 1.4E-35 | 0.4 | 2.0E-03 | 0.6 |
| AG     | 6,552  | 565   | 80  | 1.5E-14 | 0.7 | 1.7E-05 | 0.6 |
| AAG    | 395    | 47    | 4   | 8.1E-01 | 1.0 | 2.6E-01 | 0.5 |

**Enrichment of STR motifs in eSTRs.** For each motif, a Fisher's exact test was performed to test whether eSTRs were significantly more or less likely to have each motif sequence compared to all STRs analyzed. FM-eSTRs represent all eSTRs with CAVIAR score of at least 10% as defined in the main text. OR=odds ratio and p-values are two-sided. Motifs give the canonicalized repeat sequence (**Methods**).

**Table S7.** Related to Figure 4

| Motif         | Number of FM-eSTRs |
|---------------|--------------------|
| AACCCC/GGGGTT | 1/1                |
| AACCCT/AGGGTT | 1/1                |
| ACCCCC/GGGGGT | 1/0                |
| AGAGGG/CCCTCT | 2/3                |
| AGCCCC/CTGGGG | 2/4                |
| AGCCCG/CGGGCT | 1/1                |
| AGGG/CCCT     | 2/3                |
| ATGCCC/ATGGGC | 1/0                |
| C/G           | 20/20              |
| CCCCCG/CGGGGG | 1/3                |
| CCCCG/CGGGG   | 4/6                |
| AGGGG/CCCCT   | 0/1                |
| CCCG/CGGG     | 2/0                |
| CCCGG/CCGGG   | 2/1                |
| AGGGC/CCCTG   | 0/1                |
| AGGGCC/CCCTGG | 0/1                |
| AAGGG/CCCTT   | 0/1                |
| AGGCC/CCTGGG  | 0/1                |
| AGCCCG/CGGGCT | 0/1                |
| AGCCC/CTGGG   | 0/1                |
| ACCCC/GGGGT   | 0/1                |

**STR motifs with the ability to form G4 quadruplexes.** STR motifs matching the canonical G4 motif ( $G_3N_{1-7}G_3N_{1-7}G_3N_{1-7}G_3$ ). For each motif, the first sequence gives the canonical form of the motif and the second gives the reverse complement of the canonical form.

**Table S8.** Related to Figure 5

| STR locus (hg19) | Trait                                                                                          | Motif | Lead SNP    | SNP-STR LD ( $r^2$ ) | Gene                           | Best CAVIAR score                                          |
|------------------|------------------------------------------------------------------------------------------------|-------|-------------|----------------------|--------------------------------|------------------------------------------------------------|
| 1:23692212       | Glomerular filtration rate                                                                     | AATT  | rs4525087   | 0.13                 | <i>ZNF436</i>                  | 0.39 (Lung)                                                |
| 1:150314982      | Eye morphology                                                                                 | AC    | rs201983168 | 0.13                 | <i>APH1A</i>                   | 0.13 (Cells-TransformedFibroblasts)                        |
| 4:187139784      | Blood protein levels                                                                           | AC    | rs12331051  | 0.09                 | <i>AC110771.1</i>              | 0.19 (Skin-NotSunExposed)                                  |
| 5:150848654      | Basophil percentage of granulocytes                                                            | A     | rs10709981  | 0.71                 | <i>SLC36A1</i>                 | 0.43 (Skin-SunExposed)                                     |
| 6:42921475       | Blood protein levels                                                                           | AT    | rs57736976  | 0.76                 | <i>GNMT</i><br><i>PEX6</i>     | 0.13 (Adipose-Subcutaneous)<br>0.19 (Adipose-Subcutaneous) |
| 8:144839147      | Schizophrenia                                                                                  | A     | rs11784536  | 0.71                 | <i>NRBP2</i>                   | 0.15 (Thyroid)                                             |
| 9:2622147        | Hematocrit, Hemoglobin concentration                                                           | CCG   | rs369552432 | 0.15                 | <i>VLDLR</i>                   | 0.20 (WholeBlood)                                          |
| 11:5297399       | Red cell distribution width                                                                    | AC    | rs112176573 | 0.05                 | <i>HBG1</i>                    | 0.12 (Adipose-Visceral)                                    |
| 11:11907700      | Platelet count                                                                                 | CCG   | rs7108857   | 0.16                 | <i>NLRX1</i>                   | 0.19 (Cells-Transformedfibroblasts)                        |
| 12:50480263      | Achilles tendinopathy                                                                          | ACC   | rs57224706  | 0.72                 | <i>GPD1</i>                    | 0.16 (Artery-Tibial)                                       |
| 16:28871190      | Red blood cell count                                                                           | C     | rs12448902  | 0.78                 | <i>NFATC2IP</i><br><i>TUFM</i> | 0.13 (Artery-Aorta)<br>0.15 (Adipose-Subcutaneous)         |
| 19:7765393       | Blood protein levels                                                                           | AAAT  | rs113893384 | 0.99                 | <i>FCER2</i>                   | 0.13 (Lung)                                                |
| 19:10338986      | Immature fraction of reticulocytes                                                             | AAAAC | rs140658666 | 1.00                 | <i>MRPL4</i>                   | 0.13 (Skin-NotSunExposed)                                  |
| 19:45413225      | Blood protein levels<br>Free cholesterol levels in large LDL<br>LDL cholesterol<br>Serum total | C     | rs1065853   | 0.10                 | <i>APOC1</i>                   | 0.11 (Esophagus-Mucosa)                                    |



|             |                                               |       |             |     |                                   |                                             |
|-------------|-----------------------------------------------|-------|-------------|-----|-----------------------------------|---------------------------------------------|
|             | cholesterol<br>Total<br>cholesterol in<br>LDL |       |             |     |                                   |                                             |
| 19:52130149 | Blood protein<br>levels                       | AAAAC | rs147859411 | 1.0 | <i>SIGLEC14</i><br><i>SIGLEC5</i> | 0.48 (Skin-SunExposed)<br>0.18 (WholeBlood) |

**GWAS signals from the NHGRI/EBI GWAS catalog falling within FM-eSTRs.** LD was computed as the squared Pearson correlation between STR dosage and SNP genotype (0, 1, or 2 reference alleles) for each SNP. The CAVIAR score for each FM-eSTR is shown for highest-scoring tissue.

**Table S9.** Related to Figures 5 and 6

| Trait         | Gene           | STR (hg19)  | Motif | Lead SNP    | SNP-STR LD ( $r^2$ ) | Top CAVIAR score                    | Coloc |
|---------------|----------------|-------------|-------|-------------|----------------------|-------------------------------------|-------|
| Height        | <i>RFT1</i>    | 3:53128363  | AC    | rs2336725   | 0.85                 | 0.70 (Artery-Aorta)                 | 99.0% |
| Height        | <i>FADS1</i>   | 11:61620629 | AAC   | rs174547    | 0.56                 | 0.32 (Brain-Cerebellum)             | 97.7% |
| Height        | <i>LUZP1</i>   | 1:23553614  | AAC   | rs1738475   | 0.22                 | 0.48 (Adipose-Subcutaneous)         | 93.1% |
| Height        | <i>PTPRCAP</i> | 11:67238583 | AAT   | rs12795957  | 0.04                 | 0.11 (Artery-Aorta)                 | 90.5% |
| Height        | <i>UBE2Z</i>   | 17:46965665 | AGAT  | rs318095    | 0.37                 | 0.13 (Muscle-Skeletal)              | 79.0% |
| Height        | <i>SLCO1C1</i> | 12:20856340 | AAC   | rs10770705  | 0.79                 | 0.16 (Skin-NotSun Exposed)          | 76.7% |
| Height        | <i>ADAMTS3</i> | 4:73471388  | AG    | rs16848425  | 0.0058               | 0.16 (Cells-TransformedFibroblasts) | 58.1% |
| Schizophrenia | <i>PRR12</i>   | 19:50110619 | AC    | rs56873913  | 0.14                 | 0.99 (Thyroid)                      | 98.2% |
| Schizophrenia | <i>MED19</i>   | 11:57523883 | AC    | rs9420      | 0.63                 | 0.47 (Adipose-Subcutaneous)         | 90.1% |
| Schizophrenia | <i>CEBPZ</i>   | 2:37526655  | AC    | rs2372993   | 0.74                 | 0.28 (Lung)                         | 86.7% |
| Schizophrenia | <i>FAM134A</i> | 2:220082366 | A     | rs6707588   | 0.01                 | 0.12 (Esophagus-Mucosa)             | 79.8% |
| Schizophrenia | <i>TM6SF2</i>  | 19:19424949 | AAAT  | rs2905424   | 0.82                 | 0.11 (Adipose-Visceral)             | 77.3% |
| Schizophrenia | <i>TMEM81</i>  | 1:205076171 | AC    | rs16937     | 0.43                 | 0.13 (Nerve-Tibial)                 | 63.3% |
| Schizophrenia | <i>CCDC126</i> | 7:23615272  | A     | rs227932    | 0.80                 | 0.12 (Thyroid)                      | 60.2% |
| Schizophrenia | <i>SPIRE2</i>  | 16:89829656 | A     | rs12449000  | 0.69                 | 0.69 (Skin-NotSun Exposed)          | 58.7% |
| Schizophrenia | <i>VARS2</i>   | 6:30884231  | AC    | rs111782145 | 0.28                 | 0.12 (Brain-Cerebellum)             | 54.1% |

|               |               |             |   |           |      |                                    |       |
|---------------|---------------|-------------|---|-----------|------|------------------------------------|-------|
| Schizophrenia | <i>UBAP2L</i> | 1:154251259 | A | rs7521837 | 0.95 | 0.11<br>(Esophagus-<br>Muscularis) | 54.1% |
|---------------|---------------|-------------|---|-----------|------|------------------------------------|-------|

**FM-eSTRs co-located with height** (Yengo et al., 2018) **and schizophrenia** (Schizophrenia Working Group of the Psychiatric Genomics Consortium, 2014) **GWAS signals**. LD was computed as the squared Pearson correlation between STR dosage and SNP genotype (0, 1, or 2 reference alleles) for each SNP. The CAVIAR score for each FM-eSTR is shown for highest-scoring tissue. Only FM-eSTRs that had the highest CAVIAR score for each gene are shown. Coloc column shows the posterior probability of a model where both gene expression and the GWAS trait are driven by the same causal variant.

**Table S10.** Related to Figure 6

| Sequence ID | Description                                                        | Sequence                                                                                                                                                                                                                                                                                                                                                                                                                                                  |
|-------------|--------------------------------------------------------------------|-----------------------------------------------------------------------------------------------------------------------------------------------------------------------------------------------------------------------------------------------------------------------------------------------------------------------------------------------------------------------------------------------------------------------------------------------------------|
| RFT1_0rpt   | Synthetic construct for <i>RFT1</i> locus with 0 AC repeats.       | AGCTCGCTAGCCTCGAGGATACCAGCCTGGACAACATAG<br>TGAGACCATGTCTCTACCAAAAAGAAAAAGAAGGCAAG<br>CCACTGCATCCCCCAAATGCCCAGGTATAGGTCCTTGGC<br>TGATTCAGGCCAAGGTGCTGTGTGCTGTGGAGATACGCT<br>TTATCAAAGTGGGTGGTAAAAATACTACACGCTCTCACAC<br>ACAATACTATACTCCAACAGGAGAGATGTGCTTTCATCCG<br>GAGTTCAGAGAGGGAGTTTATTTGCTTTTCAGTCCAGA<br>GAGAGTCTCTTTAATGAAGTACGAGAGCCTGTACCTCA<br>CAGGGGAAGTTTTTTCACTACTAATCAGTGATCAGAAAG<br>GTCAACTTCAATCAAGATCTGGCCTCGGCG                          |
| RFT1_5rpt   | Synthetic construct for <i>RFT1</i> locus with 5 AC repeats.       | AGCTCGCTAGCCTCGAGGATACCAGCCTGGACAACATAG<br>TGAGACCATGTCTCTACCAAAAAGAAAAAGAAGGCAAG<br>CCACTGCATCCCCCAAATGCCCAGGTATAGGTCCTTGGC<br>TGATTCAGGCCAAGGTGCTGTGTGCTGTGGAGATACGCT<br>TTATCAAAGTGGGTGGTAAAAATACTACACGCACACACA<br>CACTCTCACACACAATACTATACTCCAACAGGAGAGATG<br>TGCTTTCATCCGGAGTTCCAGAGAGGGAGTTTATTTGCTT<br>TTCAGTCCAGAGAGAGTCTCTTTAATGAAGTACGAGAG<br>CCTGTACCTCACAGGGGAAGTTTTTTCACTACTAATCAGT<br>GATCAGAAAGGTCAACTTCAATCAAGATCTGGCCTCGGC<br>G           |
| RFT1_10rpt  | Synthetic construct for <i>RFT1</i> locus with 10 AC repeats.      | AGCTCGCTAGCCTCGAGGATACCAGCCTGGACAACATAG<br>TGAGACCATGTCTCTACCAAAAAGAAAAAGAAGGCAAG<br>CCACTGCATCCCCCAAATGCCCAGGTATAGGTCCTTGGC<br>TGATTCAGGCCAAGGTGCTGTGTGCTGTGGAGATACGCT<br>TTATCAAAGTGGGTGGTAAAAATACTACACGCACACACA<br>CACACACACACACTCTCACACACAATACTATACTCCAAC<br>AGGAGAGATGTGCTTTCATCCGGAGTTCCAGAGAGGGGA<br>GTTTATTTGCTTTTCAGTCCAGAGAGAGTCTCTTTAATG<br>AAGTACGAGAGCCTGTACCTCACAGGGGAAGTTTTTTC<br>CTACTAATCAGTGATCAGAAAGGTCAACTTCAATCAAGAT<br>CTGGCCTCGGCG |
| RFT1eSTR_F  | Primer for amplifying <i>RFT1</i> locus from genomic DNA (forward) | AGCTCGCTAGCCTCGAGGATACCAGCCTGGACAACATA<br>GTG                                                                                                                                                                                                                                                                                                                                                                                                             |
| RFT1eSTR_R  | Primer for amplifying <i>RFT1</i> locus from genomic DNA (reverse) | CGCCGAGGCCAGATCTTGATTGAAGTTGACCTTTCTGA<br>TCACTG                                                                                                                                                                                                                                                                                                                                                                                                          |
| CRE         | Positive control                                                   | AGCTCGCTAGCCTCGAGGATGCACCAGACAGTGACGTC<br>AGCTGCCAGATCCCATGGCCGTCACTACTGTGACGTCTTT                                                                                                                                                                                                                                                                                                                                                                        |

|  |  |                                                        |
|--|--|--------------------------------------------------------|
|  |  | CAGACACCCCATTGACGTCAATGGGAGAACATCAAGATC<br>TGGCCTCGGCG |
|--|--|--------------------------------------------------------|

**Sequences used in reporter assay analyses.** Blue sequences show homology arms used for cloning into pGL4.27 firefly luciferase plasmid. Red shows the STR region that was modified. Black shows additional genomic context.
